# Supplementary material
Source: bioRxiv or medRxiv preprint supplement (https://medrxiv.org/highwire/filestream/76936/field_highwire_adjunct_files/0/2020.04.14.20065607-1.pdf)
Supplement: Supplementary file [file 2020.04.14.20065607-1.pdf]

## METADATA

### SUPPORTING INFORMATION 1 – Number patients removed and patient recovery time

| Date         | No. infected (positive) | No. discharged | No. died  | No. removed per day |
|--------------|-------------------------|----------------|-----------|---------------------|
| 17/03/2020   | 120                     | 7              | 2         | 9                   |
| 18/03/2020   | 117                     | 11             | 0         | 11                  |
| 19/03/2020   | 110                     | 15             | 0         | 15                  |
| 20/03/2020   | 130                     | 12             | 0         | 12                  |
| 21/03/2020   | 153                     | 0              | 0         | 0                   |
| 22/03/2020   | 123                     | 25             | 6         | 31                  |
| 23/03/2020   | 212                     | 20             | 4         | 24                  |
| 24/03/2020   | 106                     | 24             | 1         | 25                  |
| 25/03/2020   | 172                     | 16             | 4         | 20                  |
| 26/03/2020   | 235                     | 16             | 6         | 22                  |
| 27/03/2020   | 130                     | 44             | 3         | 47                  |
| <b>total</b> | <b>1608</b>             | <b>190</b>     | <b>26</b> | <b>216</b>          |

| Confirmed Date | Removed    | Dead or discharge (dis) | Recovery Time |
|----------------|------------|-------------------------|---------------|
| 24/01/2020     | 14/02/2020 | dis                     | 21            |
| 24/01/2020     | 14/02/2020 | dis                     | 21            |
| 24/01/2020     | 14/02/2020 | dis                     | 21            |
| 25/01/2020     | 08/02/2020 | dis                     | 14            |
| 28/01/2020     | 14/02/2020 | dis                     | 17            |
| 28/01/2020     | 04/02/2020 | dis                     | 7             |
| 28/01/2020     | 18/02/2020 | dis                     | 21            |
| 30/01/2020     | 18/02/2020 | dis                     | 19            |
| 04/02/2020     | 17/02/2020 | dis                     | 13            |
| 03/02/2020     | 09/02/2020 | dis                     | 6             |
| 05/02/2020     | 18/02/2020 | dis                     | 13            |
| 05/02/2020     | 18/02/2020 | dis                     | 13            |
| 06/02/2020     | 22/02/2020 | dis                     | 16            |

|            |            |      |    |
|------------|------------|------|----|
| 06/02/2020 | 24/02/2020 | dis  | 18 |
| 07/02/2020 | 16/02/2020 | dis  | 9  |
| 08/02/2020 | 27/02/2020 | dis  | 19 |
| 09/02/2020 | 19/02/2020 | dis  | 10 |
| 10/02/2020 | 19/02/2020 | dis  | 9  |
| 13/02/2020 | 24/02/2020 | dis  | 11 |
| 14/02/2020 | 19/02/2020 | dis  | 5  |
| 14/02/2020 | 19/02/2020 | dis  | 5  |
| 15/02/2020 | 27/02/2020 | dis  | 12 |
| 27/02/2020 | 06/03/2020 | dis  | 8  |
| 28/02/2020 | 12/03/2020 | dis  | 13 |
| 28/02/2020 | 12/03/2020 | dis  | 13 |
| 02/03/2020 | 12/03/2020 | dis  | 10 |
| 02/03/2020 | 12/03/2020 | dis  | 10 |
| 03/03/2020 | 12/03/2020 | dis  | 9  |
| 02/03/2020 | 14/03/2020 | dis  | 12 |
| 04/03/2020 | 08/03/2020 | dis  | 4  |
| 03/03/2020 | 15/03/2020 | dis  | 12 |
| 03/03/2020 | 15/03/2020 | dis  | 12 |
| 04/03/2020 | 13/03/2020 | dis  | 9  |
| 04/03/2020 | 15/03/2020 | dis  | 11 |
| 04/03/2020 | 12/03/2020 | dis  | 8  |
| 04/03/2020 | 15/03/2020 | dis  | 11 |
| 05/03/2020 | 14/03/2020 | dis  | 9  |
| 04/03/2020 | 15/03/2020 | dis  | 11 |
| 04/03/2020 | 11/03/2020 | dis  | 7  |
| 06/03/2020 | 15/03/2020 | dis  | 9  |
| 05/03/2020 | 09/03/2020 | dis  | 4  |
| 12/03/2020 | 20/03/2020 | dead | 8  |
| 13/03/2020 | 17/03/2020 | dead | 4  |
| 14/03/2020 | 21/03/2020 | dead | 7  |
| 14/03/2020 | 22/03/2020 | dead | 8  |
| 15/03/2020 | 21/03/2020 | dead | 6  |
| 15/03/2020 | 17/03/2020 | dead | 2  |
| 17/03/2020 | 22/03/2020 | dead | 5  |
| 20/03/2020 | 23/03/2020 | dead | 3  |
| 22/03/2020 | 22/03/2020 | dead | 0  |
| 21/03/2020 | 23/03/2020 | dead | 2  |
| 19/03/2020 | 25/03/2020 | dead | 6  |
| 20/03/2020 | 25/03/2020 | dead | 5  |
| 16/03/2020 | 24/03/2020 | dead | 8  |

|            |            |      |   |
|------------|------------|------|---|
| 23/03/2020 | 26/03/2020 | dead | 3 |
| 20/03/2020 | 25/03/2020 | dead | 5 |
| 23/03/2020 | 26/03/2020 | dead | 3 |
| 23/03/2020 | 26/03/2020 | dead | 3 |

Average

9.7

Std deviation

5.342815225

## SUPPORTING INFORMATION 2

- SEIR data with  $\beta = 6.47$

| Time (Days) | S        | E        | I        | R        |
|-------------|----------|----------|----------|----------|
| 0           | 0.781250 | 0.000046 | 0.000050 | 0.218750 |
| 1           | 0.780954 | 0.000318 | 0.000079 | 0.219046 |
| 2           | 0.780363 | 0.000817 | 0.000173 | 0.219637 |
| 3           | 0.779006 | 0.001936 | 0.000401 | 0.220994 |
| 4           | 0.775840 | 0.004532 | 0.000937 | 0.224160 |
| 5           | 0.768478 | 0.010549 | 0.002188 | 0.231522 |
| 6           | 0.751589 | 0.024312 | 0.005083 | 0.248411 |
| 7           | 0.713975 | 0.054790 | 0.011673 | 0.286026 |
| 8           | 0.635524 | 0.117539 | 0.026124 | 0.364476 |
| 9           | 0.493217 | 0.227830 | 0.055407 | 0.506783 |
| 10          | 0.295848 | 0.368576 | 0.106510 | 0.704152 |
| 11          | 0.119042 | 0.464838 | 0.177213 | 0.880959 |
| 12          | 0.029642 | 0.464552 | 0.251860 | 0.970358 |
| 13          | 0.004715 | 0.406342 | 0.315074 | 0.995285 |
| 14          | 0.000540 | 0.339741 | 0.362069 | 0.999460 |
| 15          | 0.000063 | 0.281400 | 0.394349 | 0.999937 |
| 16          | 0.000020 | 0.232773 | 0.414656 | 0.999980 |
| 17          | 0.000016 | 0.192529 | 0.425467 | 0.999984 |
| 18          | 0.000016 | 0.159247 | 0.428827 | 0.999984 |
| 19          | 0.000016 | 0.131725 | 0.426405 | 0.999984 |
| 20          | 0.000015 | 0.108966 | 0.419554 | 0.999985 |
| 21          | 0.000015 | 0.090147 | 0.409366 | 0.999985 |
| 22          | 0.000017 | 0.074582 | 0.396726 | 0.999983 |
| 23          | 0.000017 | 0.061713 | 0.382342 | 0.999983 |
| 24          | 0.000018 | 0.051071 | 0.366784 | 0.999982 |
| 25          | 0.000019 | 0.042271 | 0.350500 | 0.999981 |
| 26          | 0.000020 | 0.034994 | 0.333850 | 0.999980 |
| 27          | 0.000021 | 0.028976 | 0.317112 | 0.999979 |
| 28          | 0.000022 | 0.023999 | 0.300501 | 0.999978 |
| 29          | 0.000023 | 0.019884 | 0.284183 | 0.999977 |
| 30          | 0.000024 | 0.016481 | 0.268282 | 0.999976 |
| 31          | 0.000026 | 0.013667 | 0.252888 | 0.999974 |
| 32          | 0.000027 | 0.011340 | 0.238067 | 0.999973 |
| 33          | 0.000029 | 0.009415 | 0.223859 | 0.999971 |
| 34          | 0.000031 | 0.007824 | 0.210291 | 0.999969 |

|    |          |          |          |          |
|----|----------|----------|----------|----------|
| 35 | 0.000033 | 0.006508 | 0.197375 | 0.999967 |
| 36 | 0.000035 | 0.005419 | 0.185113 | 0.999965 |
| 37 | 0.000037 | 0.004519 | 0.173499 | 0.999963 |
| 38 | 0.000039 | 0.003775 | 0.162520 | 0.999961 |
| 39 | 0.000042 | 0.003159 | 0.152160 | 0.999958 |
| 40 | 0.000044 | 0.002649 | 0.142397 | 0.999956 |
| 41 | 0.000047 | 0.002228 | 0.133210 | 0.999953 |
| 42 | 0.000050 | 0.001879 | 0.124575 | 0.999950 |
| 43 | 0.000053 | 0.001591 | 0.116465 | 0.999947 |
| 44 | 0.000057 | 0.001352 | 0.108855 | 0.999943 |
| 45 | 0.000060 | 0.001154 | 0.101721 | 0.999940 |
| 46 | 0.000064 | 0.000991 | 0.095036 | 0.999936 |
| 47 | 0.000068 | 0.000855 | 0.088776 | 0.999932 |
| 48 | 0.000073 | 0.000743 | 0.082917 | 0.999927 |
| 49 | 0.000077 | 0.000650 | 0.077435 | 0.999923 |
| 50 | 0.000082 | 0.000572 | 0.072308 | 0.999918 |
| 51 | 0.000088 | 0.000508 | 0.067516 | 0.999912 |
| 52 | 0.000093 | 0.000455 | 0.063037 | 0.999907 |
| 53 | 0.000099 | 0.000411 | 0.058852 | 0.999901 |
| 54 | 0.000105 | 0.000374 | 0.054943 | 0.999895 |
| 55 | 0.000111 | 0.000343 | 0.051291 | 0.999889 |
| 56 | 0.000118 | 0.000317 | 0.047882 | 0.999882 |
| 57 | 0.000125 | 0.000295 | 0.044699 | 0.999875 |
| 58 | 0.000133 | 0.000277 | 0.041728 | 0.999867 |
| 59 | 0.000141 | 0.000261 | 0.038954 | 0.999859 |
| 60 | 0.000149 | 0.000248 | 0.036366 | 0.999851 |
| 61 | 0.000158 | 0.000237 | 0.033950 | 0.999842 |
| 62 | 0.000167 | 0.000227 | 0.031696 | 0.999833 |
| 63 | 0.000176 | 0.000219 | 0.029593 | 0.999824 |
| 64 | 0.000186 | 0.000212 | 0.027631 | 0.999814 |
| 65 | 0.000197 | 0.000205 | 0.025800 | 0.999803 |
| 66 | 0.000208 | 0.000199 | 0.024092 | 0.999792 |
| 67 | 0.000219 | 0.000194 | 0.022498 | 0.999781 |
| 68 | 0.000231 | 0.000189 | 0.021011 | 0.999769 |
| 69 | 0.000243 | 0.000185 | 0.019624 | 0.999757 |
| 70 | 0.000256 | 0.000181 | 0.018330 | 0.999744 |
| 71 | 0.000270 | 0.000177 | 0.017123 | 0.999730 |
| 72 | 0.000284 | 0.000173 | 0.015997 | 0.999716 |
| 73 | 0.000298 | 0.000170 | 0.014946 | 0.999702 |
| 74 | 0.000313 | 0.000166 | 0.013966 | 0.999687 |
| 75 | 0.000329 | 0.000163 | 0.013051 | 0.999671 |

|     |          |          |          |          |
|-----|----------|----------|----------|----------|
| 76  | 0.000345 | 0.000160 | 0.012198 | 0.999655 |
| 77  | 0.000361 | 0.000157 | 0.011402 | 0.999639 |
| 78  | 0.000378 | 0.000154 | 0.010659 | 0.999622 |
| 79  | 0.000396 | 0.000151 | 0.009966 | 0.999604 |
| 80  | 0.000414 | 0.000147 | 0.009319 | 0.999586 |
| 81  | 0.000433 | 0.000144 | 0.008716 | 0.999567 |
| 82  | 0.000453 | 0.000141 | 0.008152 | 0.999547 |
| 83  | 0.000473 | 0.000138 | 0.007626 | 0.999527 |
| 84  | 0.000493 | 0.000135 | 0.007136 | 0.999507 |
| 85  | 0.000514 | 0.000132 | 0.006678 | 0.999486 |
| 86  | 0.000536 | 0.000130 | 0.006250 | 0.999464 |
| 87  | 0.000558 | 0.000127 | 0.005851 | 0.999442 |
| 88  | 0.000580 | 0.000124 | 0.005478 | 0.999420 |
| 89  | 0.000604 | 0.000121 | 0.005130 | 0.999396 |
| 90  | 0.000627 | 0.000118 | 0.004805 | 0.999373 |
| 91  | 0.000652 | 0.000115 | 0.004501 | 0.999348 |
| 92  | 0.000677 | 0.000112 | 0.004217 | 0.999323 |
| 93  | 0.000702 | 0.000109 | 0.003952 | 0.999298 |
| 94  | 0.000728 | 0.000106 | 0.003705 | 0.999272 |
| 95  | 0.000754 | 0.000104 | 0.003473 | 0.999246 |
| 96  | 0.000781 | 0.000101 | 0.003257 | 0.999219 |
| 97  | 0.000808 | 0.000098 | 0.003055 | 0.999192 |
| 98  | 0.000836 | 0.000096 | 0.002866 | 0.999164 |
| 99  | 0.000864 | 0.000093 | 0.002690 | 0.999136 |
| 100 | 0.000893 | 0.000090 | 0.002524 | 0.999107 |

### SUPPORTING INFORMATION 3

- SEIR data with  $\beta = 2.91$

| Time (Days) | S        | E        | I        | R        |
|-------------|----------|----------|----------|----------|
|             | 0.781250 | 0.000046 | 0.000050 | 0.218750 |
| 1           | 0.781132 | 0.000154 | 0.000065 | 0.218868 |
| 2           | 0.780958 | 0.000297 | 0.000101 | 0.219043 |
| 3           | 0.780667 | 0.000521 | 0.000168 | 0.219333 |
| 4           | 0.780173 | 0.000893 | 0.000284 | 0.219827 |
| 5           | 0.779332 | 0.001519 | 0.000482 | 0.220668 |
| 6           | 0.777901 | 0.002579 | 0.000818 | 0.222099 |
| 7           | 0.775474 | 0.004370 | 0.001388 | 0.224526 |
| 8           | 0.771369 | 0.007393 | 0.002353 | 0.228631 |
| 9           | 0.764458 | 0.012467 | 0.003981 | 0.235542 |
| 10          | 0.752915 | 0.020915 | 0.006719 | 0.247085 |
| 11          | 0.733866 | 0.034789 | 0.011288 | 0.266134 |
| 12          | 0.703055 | 0.057047 | 0.018818 | 0.296945 |
| 13          | 0.654820 | 0.091410 | 0.030989 | 0.345180 |
| 14          | 0.583164 | 0.141237 | 0.050039 | 0.416836 |
| 15          | 0.484987 | 0.206597 | 0.078430 | 0.515013 |
| 16          | 0.365532 | 0.279867 | 0.117823 | 0.634468 |
| 17          | 0.241891 | 0.343949 | 0.167458 | 0.758109 |
| 18          | 0.137158 | 0.379414 | 0.223085 | 0.862842 |
| 19          | 0.066118 | 0.377963 | 0.278025 | 0.933882 |
| 20          | 0.027420 | 0.347431 | 0.326070 | 0.972580 |
| 21          | 0.010050 | 0.302937 | 0.363739 | 0.989950 |
| 22          | 0.003372 | 0.256531 | 0.390382 | 0.996628 |
| 23          | 0.001080 | 0.214222 | 0.407035 | 0.998920 |
| 24          | 0.000351 | 0.177836 | 0.415340 | 0.999649 |
| 25          | 0.000130 | 0.147295 | 0.416956 | 0.999870 |
| 26          | 0.000064 | 0.121900 | 0.413349 | 0.999936 |
| 27          | 0.000045 | 0.100859 | 0.405741 | 0.999955 |
| 28          | 0.000040 | 0.083447 | 0.395135 | 0.999960 |
| 29          | 0.000039 | 0.069044 | 0.382339 | 0.999961 |
| 30          | 0.000040 | 0.057133 | 0.368005 | 0.999960 |
| 31          | 0.000041 | 0.047283 | 0.352652 | 0.999959 |
| 32          | 0.000043 | 0.039137 | 0.336693 | 0.999957 |
| 33          | 0.000045 | 0.032401 | 0.320454 | 0.999955 |
| 34          | 0.000047 | 0.026831 | 0.304189 | 0.999953 |
| 35          | 0.000049 | 0.022225 | 0.288094 | 0.999951 |

|    |          |          |          |          |
|----|----------|----------|----------|----------|
| 36 | 0.000052 | 0.018415 | 0.272319 | 0.999948 |
| 37 | 0.000054 | 0.015265 | 0.256976 | 0.999946 |
| 38 | 0.000057 | 0.012660 | 0.242144 | 0.999943 |
| 39 | 0.000061 | 0.010505 | 0.227881 | 0.999939 |
| 40 | 0.000064 | 0.008724 | 0.214222 | 0.999936 |
| 41 | 0.000068 | 0.007250 | 0.201191 | 0.999932 |
| 42 | 0.000072 | 0.006031 | 0.188795 | 0.999928 |
| 43 | 0.000076 | 0.005023 | 0.177033 | 0.999924 |
| 44 | 0.000081 | 0.004189 | 0.165900 | 0.999919 |
| 45 | 0.000085 | 0.003499 | 0.155380 | 0.999915 |
| 46 | 0.000090 | 0.002929 | 0.145456 | 0.999910 |
| 47 | 0.000096 | 0.002457 | 0.136109 | 0.999904 |
| 48 | 0.000102 | 0.002066 | 0.127315 | 0.999898 |
| 49 | 0.000108 | 0.001742 | 0.119051 | 0.999892 |
| 50 | 0.000114 | 0.001475 | 0.111291 | 0.999886 |
| 51 | 0.000121 | 0.001253 | 0.104012 | 0.999879 |
| 52 | 0.000128 | 0.001069 | 0.097188 | 0.999872 |
| 53 | 0.000136 | 0.000917 | 0.090796 | 0.999864 |
| 54 | 0.000143 | 0.000791 | 0.084810 | 0.999857 |
| 55 | 0.000152 | 0.000686 | 0.079208 | 0.999848 |
| 56 | 0.000161 | 0.000599 | 0.073967 | 0.999839 |
| 57 | 0.000170 | 0.000526 | 0.069066 | 0.999830 |
| 58 | 0.000179 | 0.000466 | 0.064485 | 0.999821 |
| 59 | 0.000190 | 0.000416 | 0.060204 | 0.999810 |
| 60 | 0.000200 | 0.000374 | 0.056203 | 0.999800 |
| 61 | 0.000211 | 0.000339 | 0.052467 | 0.999789 |
| 62 | 0.000223 | 0.000309 | 0.048977 | 0.999777 |
| 63 | 0.000235 | 0.000284 | 0.045718 | 0.999765 |
| 64 | 0.000247 | 0.000263 | 0.042676 | 0.999753 |
| 65 | 0.000260 | 0.000246 | 0.039835 | 0.999740 |
| 66 | 0.000274 | 0.000230 | 0.037184 | 0.999726 |
| 67 | 0.000288 | 0.000217 | 0.034710 | 0.999712 |
| 68 | 0.000303 | 0.000206 | 0.032401 | 0.999697 |
| 69 | 0.000318 | 0.000196 | 0.030246 | 0.999682 |
| 70 | 0.000334 | 0.000187 | 0.028235 | 0.999666 |
| 71 | 0.000350 | 0.000180 | 0.026358 | 0.999650 |
| 72 | 0.000367 | 0.000173 | 0.024608 | 0.999633 |
| 73 | 0.000385 | 0.000167 | 0.022974 | 0.999615 |
| 74 | 0.000403 | 0.000161 | 0.021450 | 0.999597 |
| 75 | 0.000422 | 0.000156 | 0.020028 | 0.999578 |
| 76 | 0.000441 | 0.000151 | 0.018701 | 0.999559 |



|     |          |          |          |          |
|-----|----------|----------|----------|----------|
| 77  | 0.000461 | 0.000146 | 0.017463 | 0.999539 |
| 78  | 0.000481 | 0.000142 | 0.016309 | 0.999519 |
| 79  | 0.000502 | 0.000138 | 0.015231 | 0.999498 |
| 80  | 0.000524 | 0.000134 | 0.014226 | 0.999476 |
| 81  | 0.000546 | 0.000130 | 0.013288 | 0.999454 |
| 82  | 0.000568 | 0.000127 | 0.012412 | 0.999432 |
| 83  | 0.000592 | 0.000123 | 0.011596 | 0.999408 |
| 84  | 0.000616 | 0.000120 | 0.010833 | 0.999384 |
| 85  | 0.000640 | 0.000117 | 0.010122 | 0.999360 |
| 86  | 0.000665 | 0.000113 | 0.009459 | 0.999335 |
| 87  | 0.000690 | 0.000110 | 0.008839 | 0.999310 |
| 88  | 0.000716 | 0.000107 | 0.008261 | 0.999284 |
| 89  | 0.000743 | 0.000104 | 0.007722 | 0.999257 |
| 90  | 0.000770 | 0.000101 | 0.007218 | 0.999230 |
| 91  | 0.000798 | 0.000098 | 0.006748 | 0.999202 |
| 92  | 0.000826 | 0.000095 | 0.006309 | 0.999174 |
| 93  | 0.000854 | 0.000092 | 0.005900 | 0.999146 |
| 94  | 0.000884 | 0.000089 | 0.005517 | 0.999116 |
| 95  | 0.000913 | 0.000087 | 0.005160 | 0.999087 |
| 96  | 0.000943 | 0.000084 | 0.004827 | 0.999057 |
| 97  | 0.000974 | 0.000081 | 0.004515 | 0.999026 |
| 98  | 0.001005 | 0.000079 | 0.004225 | 0.998995 |
| 99  | 0.001036 | 0.000076 | 0.003953 | 0.998964 |
| 100 | 0.001068 | 0.000074 | 0.003699 | 0.998932 |
